# Supplementary material for: Six-coordinate CoIII and four-coordinate MII (M = Co, Zn) mixed-valence dimers supported by a deprotonated pyridine amide ligand: magnetism of a CoIIICoII complex and C–H⋯O/Cl/Br interactions
Source: Royal Society of Chemistry journal article supplement (doi:10.1039/b814303j), 2009-01-01
Supplement: b814303j.pdf [file b814303j.pdf]

## **Supporting Information**

**Six-coordinate Co<sup>III</sup> and four-coordinate M<sup>II</sup> (M = Co, Zn) mixed-valence dimers supported by a deprotonated pyridine amide ligand: magnetism of a Co<sup>III</sup>Co<sup>II</sup> complex and C–H<sup>···</sup>O/Cl/Br interactions**

**Wilson Jacob,<sup>a</sup> Haritosh Mishra,<sup>a</sup> Sharmila Pandey,<sup>a</sup> Francesc Lloret<sup>b</sup> and Rabindranath Mukherjee<sup>\*a</sup>**

<sup>a</sup> Department of Chemistry, Indian Institute of Technology Kanpur, Kanpur 208 016, India. E-mail: [rnm@iitk.ac.in](mailto:rnm@iitk.ac.in)

<sup>b</sup> Departament de Química Inorgànica/Institut de Ciència Molecular (ICMOL), Universitat de València, Polígono de la Coma, s/n, 46980-Paterna (València), Spain

---

## **Supplementary Figures**

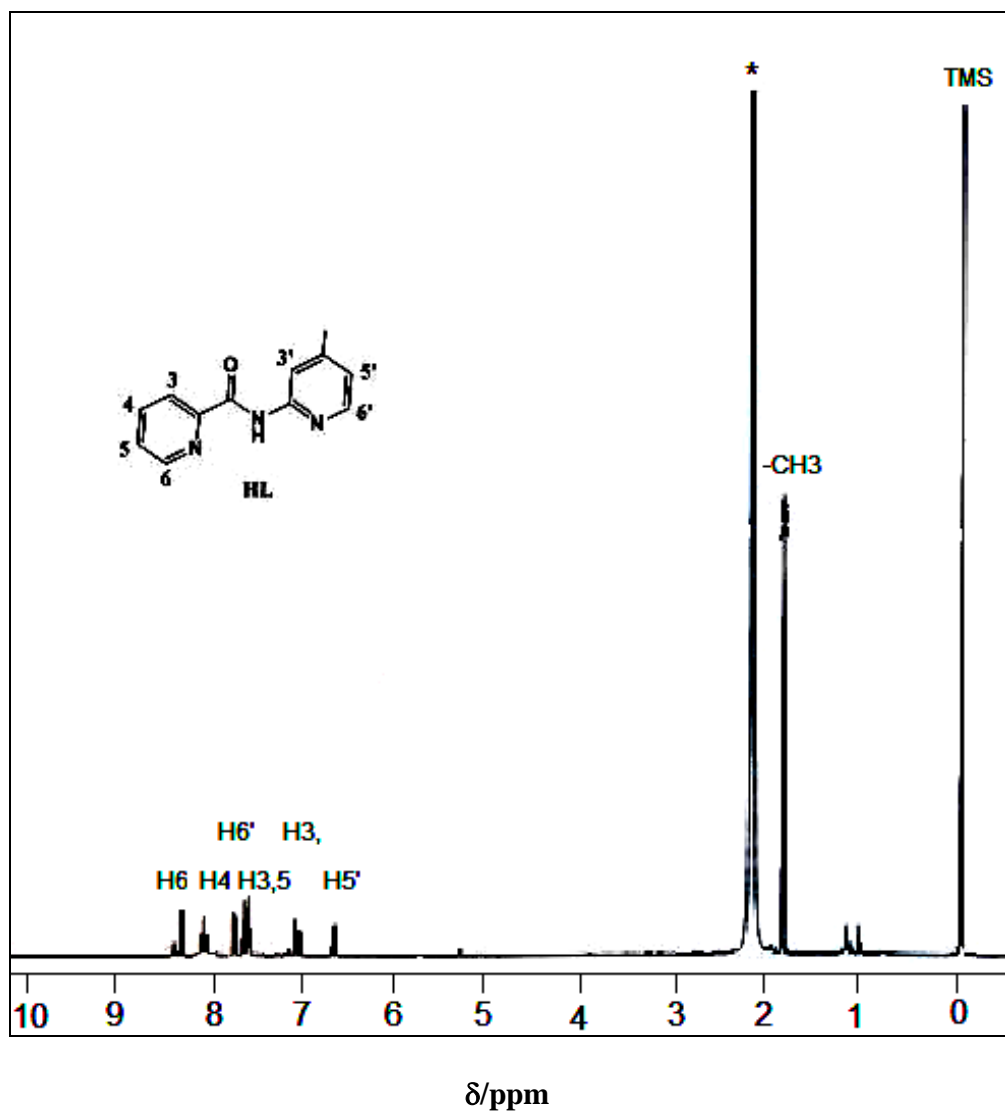

**Fig. S1**  $^1\text{H}$  NMR spectrum (500 MHz) of  $[\text{Co}^{\text{III}}\text{Zn}^{\text{II}}(\text{L})_3(\text{Cl})]\text{Cl}\cdot\text{CH}_3\text{OH}\cdot 5\text{H}_2\text{O}$  (3) in  $\text{CD}_3\text{CN}$  at 298 K (water peak is marked by \*).

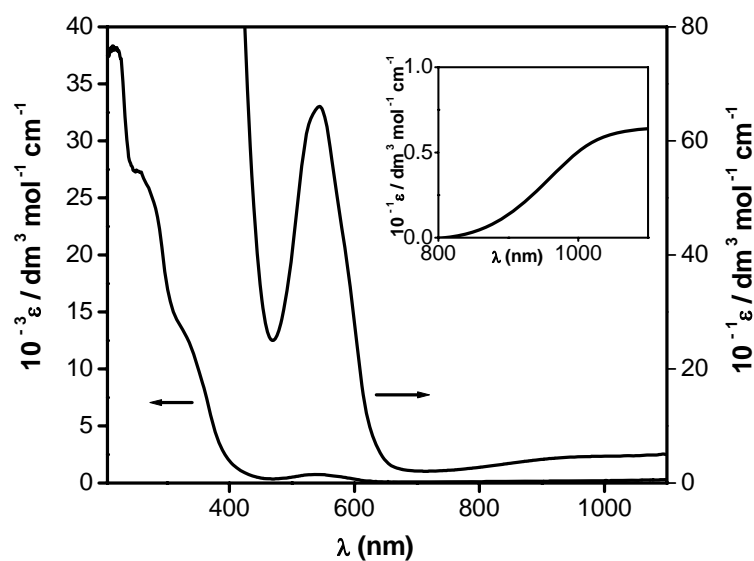

**Fig. S2** Absorption spectrum ( $\text{CH}_3\text{CN}$ ) of  $[\text{Co}^{\text{III,II}}_2(\text{L})_3\text{Cl}]\text{Cl}$  (**1**).

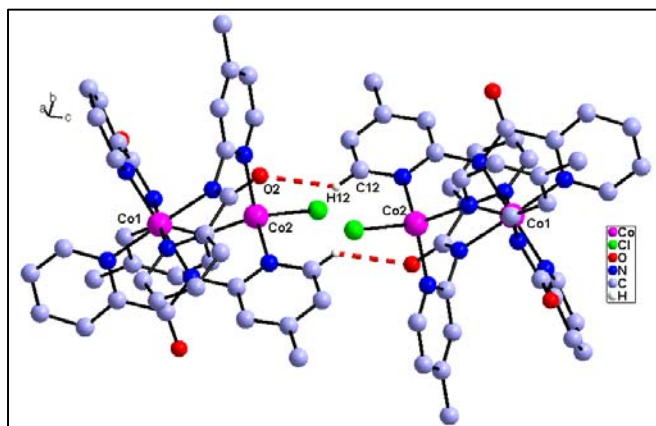

**Fig. S3** Perspective view of the formation of a dimer through  $\text{C-H}\cdots\text{O}$  hydrogen-bonding of  $[\text{Co}^{\text{III,II}}_2(\text{L})_3\text{Cl}]^+$  unit in  $[\text{Co}^{\text{III,II}}_2(\text{L})_3\text{Cl}]\text{Cl}$  (**1**). All the hydrogen atoms except those involved in hydrogen-bonding have been omitted for clarity. Dimer is generated by the symmetry operator  $2-x, -y, -z$ .

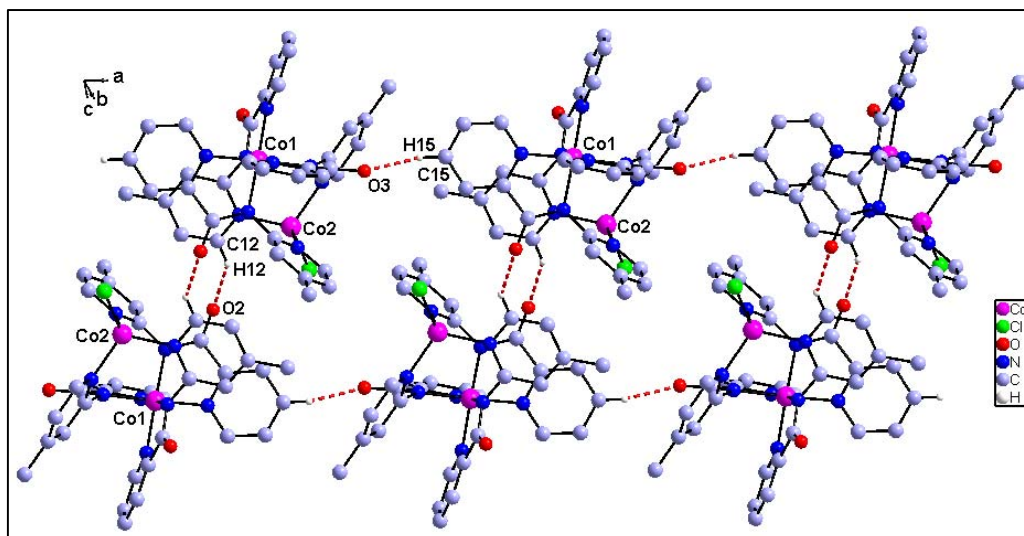

**Fig. S4** View of the formation of 1D chain *via* C–H $\cdots$ O hydrogen-bonding of  $[\text{Co}^{\text{III,II}}_2(\text{L})_3(\text{Cl})]^+$  unit in  $[\text{Co}^{\text{III,II}}_2(\text{L})_3(\text{Cl})]\text{Cl}$  (**1**). All the hydrogen atoms except those involved in hydrogen-bonding have been omitted for clarity. 1D chain is generated by the symmetry operators  $2-x, -y, -z$ ;  $-1+x, y, z$  and  $1+x, y, z$ .

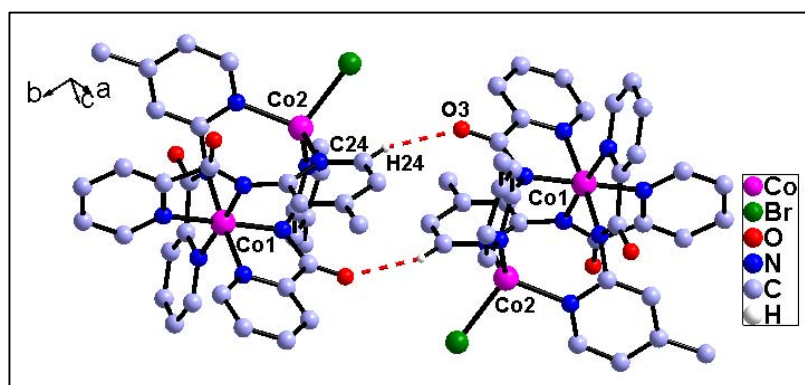

**Fig. S5** View of the formation of a dimer through C–H $\cdots$ O hydrogen-bonding of  $[\text{Co}^{\text{III,II}}_2(\text{L})_3(\text{Br})]^+$  unit in  $[\text{Co}^{\text{III,II}}_2(\text{L})_3(\text{Br})]\text{Br}\cdot\text{CH}_3\text{OH}$  (**2**). All the hydrogen atoms except those involved in hydrogen-bonding have been omitted for clarity. Dimer is generated by the symmetry operator  $2-x, -y, 1-z$ .

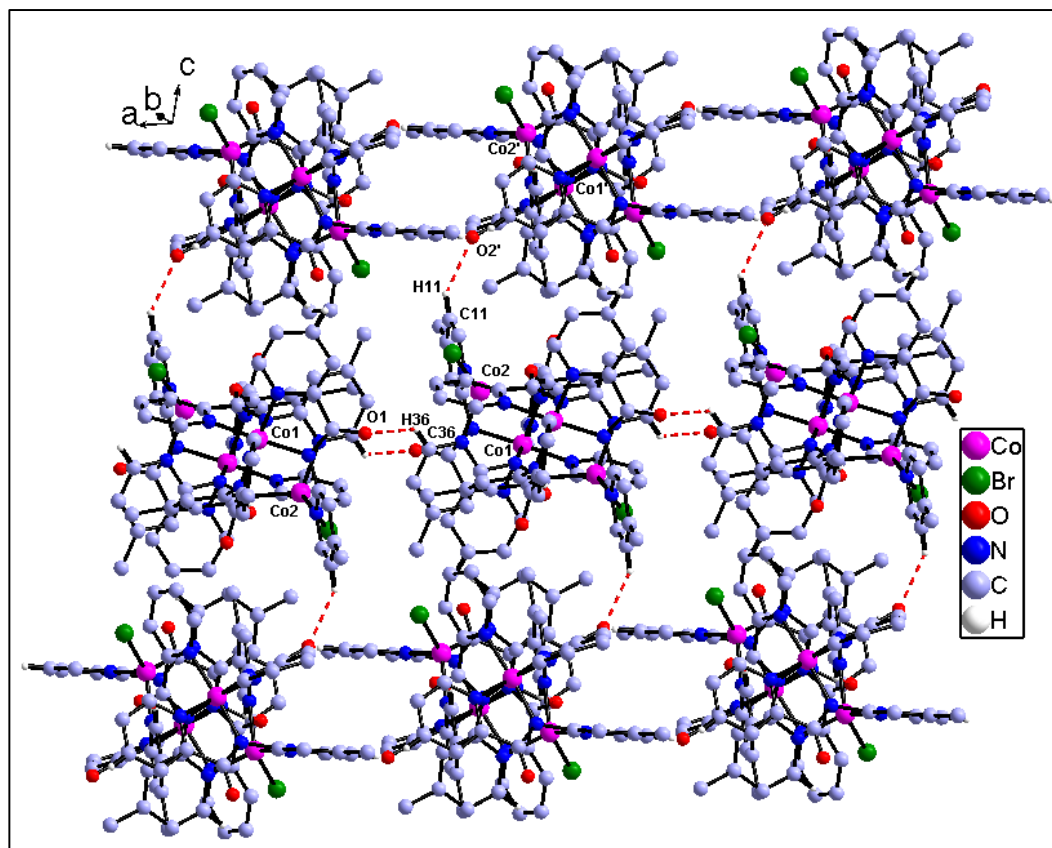

**Fig. S6** View of the formation of 2D network *via* C–H...O hydrogen-bonding of  $[\text{Co}^{\text{III,II}}_2(\text{L})_3(\text{Br})]^+$  unit in  $[\text{Co}^{\text{III,II}}_2(\text{L})_3(\text{Br})]\text{Br}\cdot\text{CH}_3\text{OH}$  (**2**). All the hydrogen atoms except those involved in hydrogen-bonding have been omitted for clarity. 2D network is generated by the symmetry operator 1-x, 1-y, -z and 1-x, -y, 1-z.

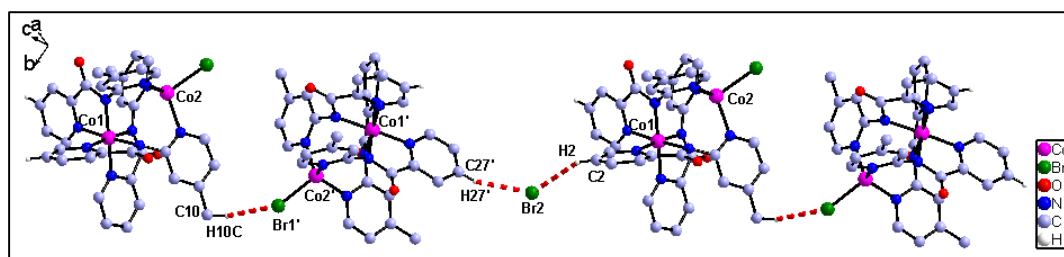

**Fig. S7** View of the formation of 1D chain *via* C–H...Br hydrogen-bonding of  $[\text{Co}^{\text{III,II}}_2(\text{L})_3(\text{Br})]^+$  unit in  $[\text{Co}^{\text{III,II}}_2(\text{L})_3(\text{Br})]\text{Br}\cdot\text{CH}_3\text{OH}$  (**2**). All the hydrogen atoms except those involved in hydrogen-bonding have been omitted for clarity. 1D chain is generated by the symmetry operators x, y, z; x, 1+y, z; x, -1+y, z; 1+x, y, 1+z and -1+x, y, -1+z.

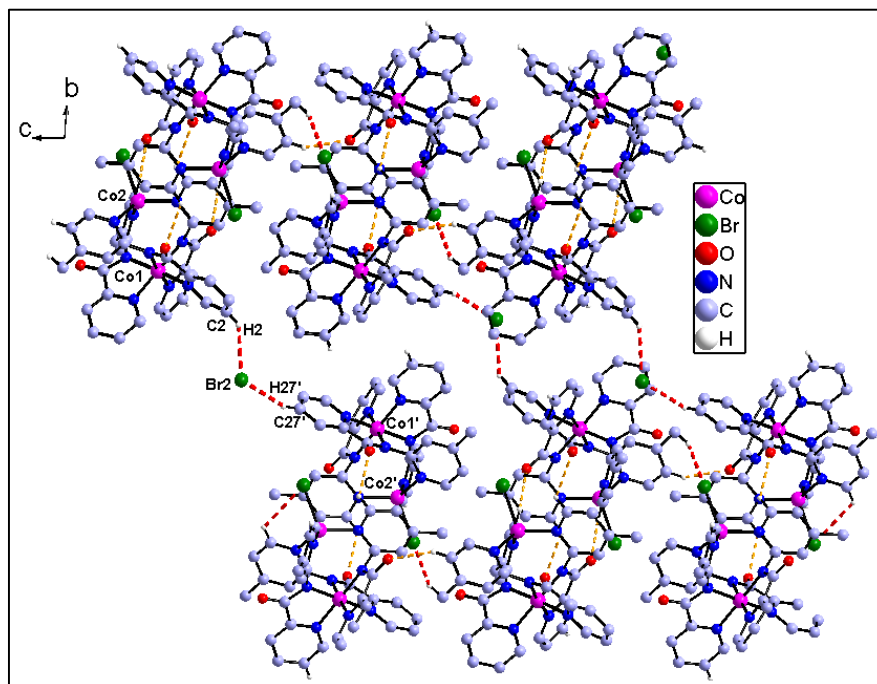

**Fig. S8** View (*bc* plane) of the formation of 3D network in  $[\text{Co}^{\text{III,II}}_2(\text{L})_3(\text{Br})]^+$  unit in  $[\text{Co}^{\text{III,II}}_2(\text{L})_3(\text{Br})]\text{Br}\cdot\text{CH}_3\text{OH}$  (**2**) via C–H $\cdots$ Br and C–H $\cdots$ O hydrogen-bonding contacts. All the hydrogen atoms except those involved in hydrogen-bonding have been omitted for clarity. 3D network is generated by the symmetry operators  $x, y, z; 1+x, y, 1+z; -1+x, y, -1+z; 2-x, -y, 1-z; 1-x, -y, 1-z; 1-x, 1-y, -z; x, 1+y, z$  and  $x, -1+y, z$ .

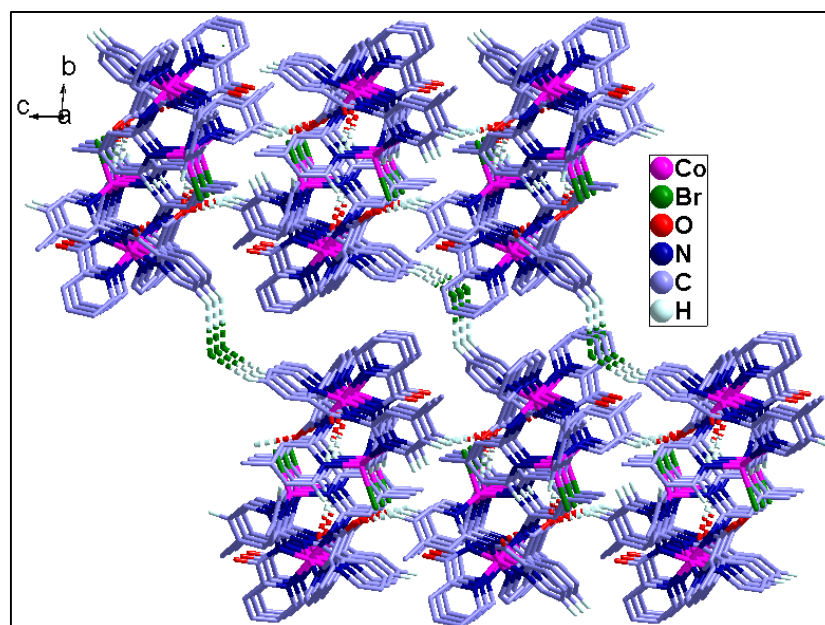

**Fig. S9** View (*ab* plane) of the formation of 3D network in  $[\text{Co}^{\text{III,II}}_2(\text{L})_3(\text{Br})]^+$  unit in  $[\text{Co}^{\text{III,II}}_2(\text{L})_3(\text{Br})]\text{Br}\cdot\text{CH}_3\text{OH}$  (**2**) via C–H $\cdots$ Br and C–H $\cdots$ O hydrogen-bonding contacts. All

the hydrogen atoms except those involved in hydrogen-bonding have been omitted for clarity.

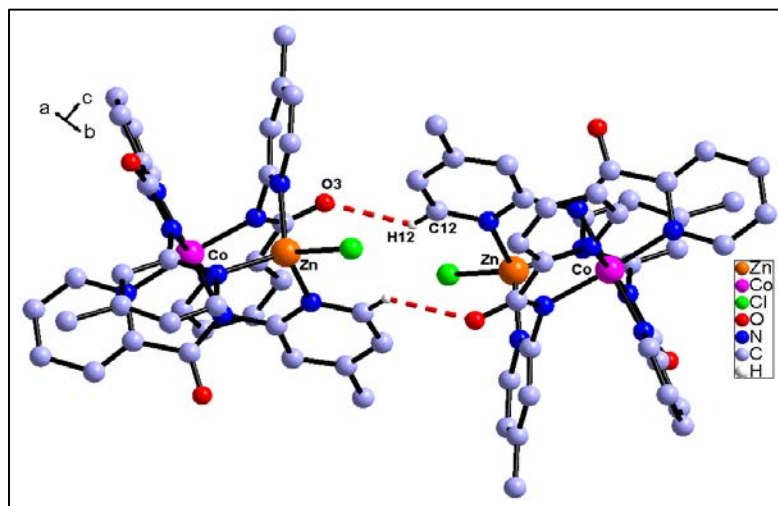

**Fig. S10** View of the formation of a dimer through C–H...O hydrogen-bonding of  $[\text{Co}^{\text{III}}\text{Zn}^{\text{II}}(\text{L})_3(\text{Cl})]^+$  unit in  $[\text{Co}^{\text{III}}\text{Zn}^{\text{II}}(\text{L})_3(\text{Cl})]\text{Cl}\cdot\text{CH}_3\text{OH}\cdot 5\text{H}_2\text{O}$  (**3**). All the hydrogen atoms except those involved in hydrogen-bonding have been omitted for clarity. Dimer is generated by the symmetry operator  $1-x, -y, -z$ .

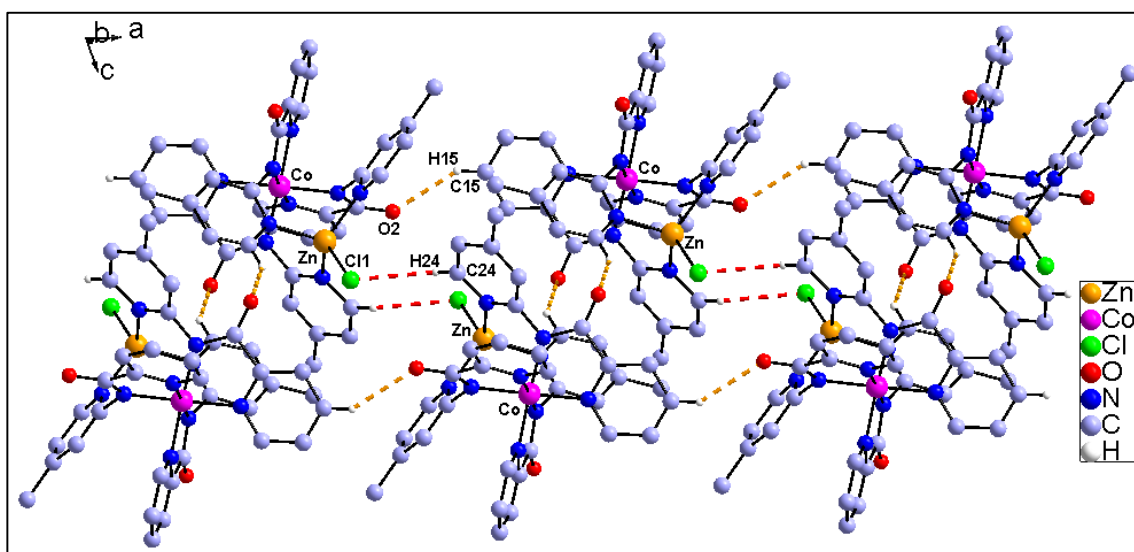

**Fig. S11** View (*ac* plane) of the formation of the 1D chain *via* C–H...O and C–H...Cl hydrogen-bonding of  $[\text{Co}^{\text{III}}\text{Zn}^{\text{II}}(\text{L})_3(\text{Cl})]^+$  unit in  $[\text{Co}^{\text{III}}\text{Zn}^{\text{II}}(\text{L})_3(\text{Cl})]\text{Cl}\cdot\text{CH}_3\text{OH}\cdot 5\text{H}_2\text{O}$  (**3**). All the hydrogen atoms except those involved in hydrogen-bonding have been omitted for clarity. 1D chain is generated by the symmetry operator  $1-x, -y, -z$ ;  $-1+x, y, z$ ;  $1+x, y, z$  and  $-x, -y, -z$ .

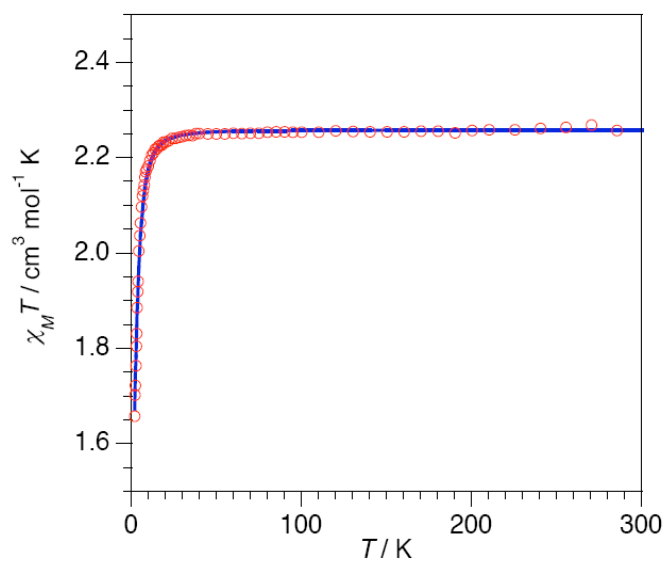

**Fig. S12**  $\chi_M T$  vs.  $T$  data and best theoretical plot for  $[\text{Co}^{\text{III,II}}_2(\text{L})_3(\text{Cl})]\text{Cl}$  (**1**).

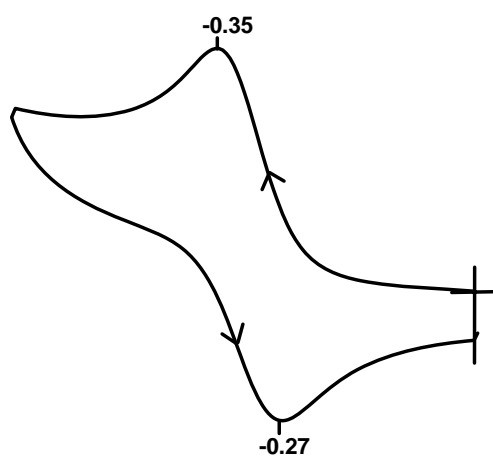

**Fig. S13** Cyclic voltammogram (scan rate:  $100 \text{ mV s}^{-1}$ ) of  $\sim 1.0 \text{ mM}$  solution of  $[\text{Co}^{\text{III,II}}_2(\text{L})_3(\text{Cl})]\text{Cl}$  (**1**) in  $\text{CH}_3\text{CN}$  ( $\sim 0.1 \text{ M}$  in TBAP) at a Pt working electrode. Indicated potentials (in V) are vs. SCE.
